# Supplementary material
Source: PubMed Central journal article supplement (PMC7760087)
Supplement: am0c18852_si_001.pdf [file am0c18852_si_001.pdf]

## **Supporting Information**

### **Versatile phosphate diester based flame retardant vitrimers via catalyst-free mixed transesterification**

Xiaming Feng, Guoqiang Li\*

*Department of Mechanical & Industrial Engineering, Louisiana State University,*

*Baton Rouge, LA 70803, United States*

*\*Corresponding author. E-mail: lguoqi1@lsu.edu; Tel.: 001-225-578-5302*

## Calculations.

Calculation of the cross-linking density ( $\delta$ ) can be performed using Eqs. (1)<sup>1-2</sup>:

$$\delta = E' / 3RT \quad (1)$$

where R is universal gas constant (8.314 m<sup>3</sup>·Pa/K·mol); T is absolute temperature (455.55 K), and E' is storage modulus (75.7 MPa) at rubber state (T<sub>g</sub> + 30 °C). The  $\delta$  value for the BPA network at T<sub>g</sub> + 30 °C is found to be 7.1 × 10<sup>3</sup> mol/m<sup>3</sup>.

For determining activation energy (E<sub>a</sub>) of the BPA network. The relaxation time  $\tau$  were fitted to the Arrhenius equation (Eq. (2)):

$$\ln \tau (t) = \ln \tau_0 + E_a / RT \quad (2)$$

where R is universal gas constant (8.314 m<sup>3</sup>·Pa/K·mol); T is absolute temperature; the characteristic relaxation time  $\tau$  can be obtained from the stress relaxation test at elevated temperatures. E<sub>a</sub> is the activation energy of the BPA networks determined by Figure 2b.

T<sub>v</sub> is defined as the liquid-to-solid transition temperature, where the viscosity ( $\eta$ ) is 10<sup>12</sup> Pa·s. The T<sub>v</sub> value was obtained using Maxwell's relation (Eq. (3)) and Arrhenius relationship (Eq. (2))<sup>1-2</sup>.

$$\eta = \tau E' / 2 (1 + \nu) \quad (3)$$

where  $\nu$  is Poisson's ratio (0.3); E' is storage modulus (75.7 MPa) at stable rubbery state (T<sub>g</sub> + 30 °C); By inputting the values of Poisson's ratio and E' and  $\eta = 10^{12}$  Pa·s into equation (3), an extrapolated relaxation time  $\tau = 34,346$  s is obtained. By plugging this extrapolated relaxation time back into the linear fitting equation (4) (Figure 2c) of equation (2), the calculated T<sub>v</sub> is about 9.1 °C.

$$y = 5.15 x - 7.80 \quad (4)$$

where x is 1000/T (K<sup>-1</sup>) and y is ln  $\tau$  (s).

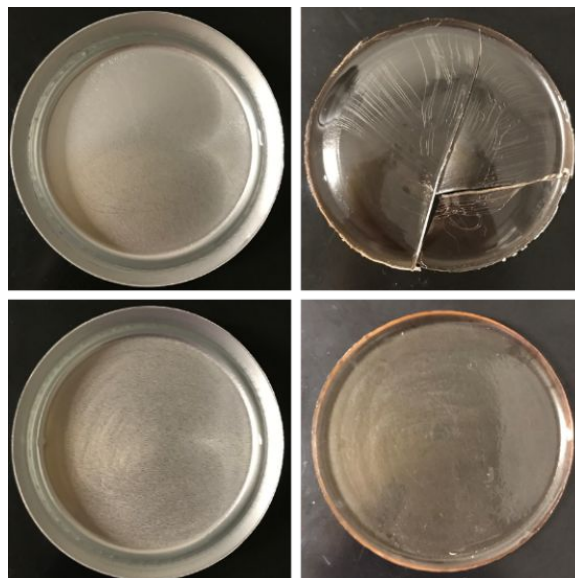

**Figure S1.** Photos of the HDA monomer with 3 wt% photo initiator (upper left) and its UV cured polymer (upper right), the BPA monomer with 3 wt% photo initiator (lower left) and its UV cured polymer (lower right).

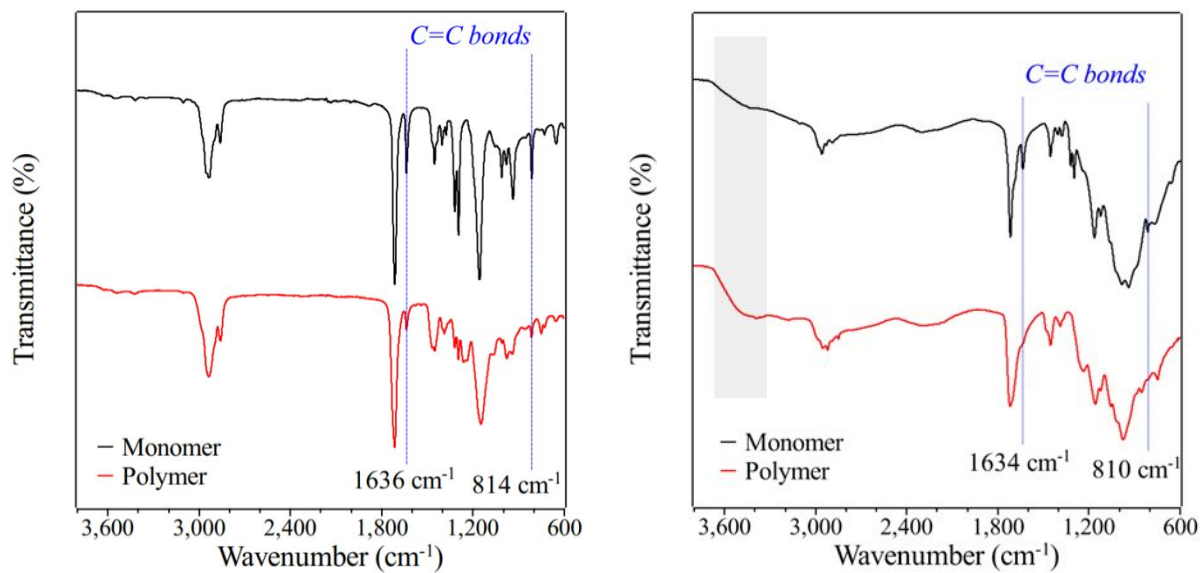

**Figure S2.** FTIR of the HDA monomer and its UV cured polymer (left). FTIR of the BPA monomer and its UV cured polymer (right).

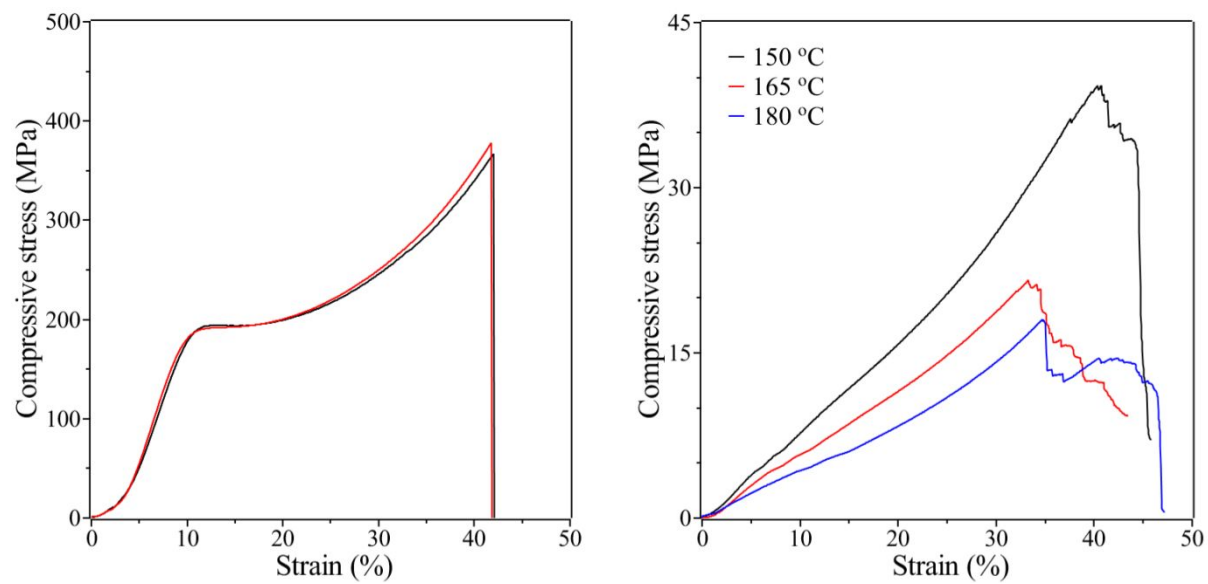

**Figure S3.** Compressive curves of the BPA samples at room temperature (left) and elevated temperatures (right).

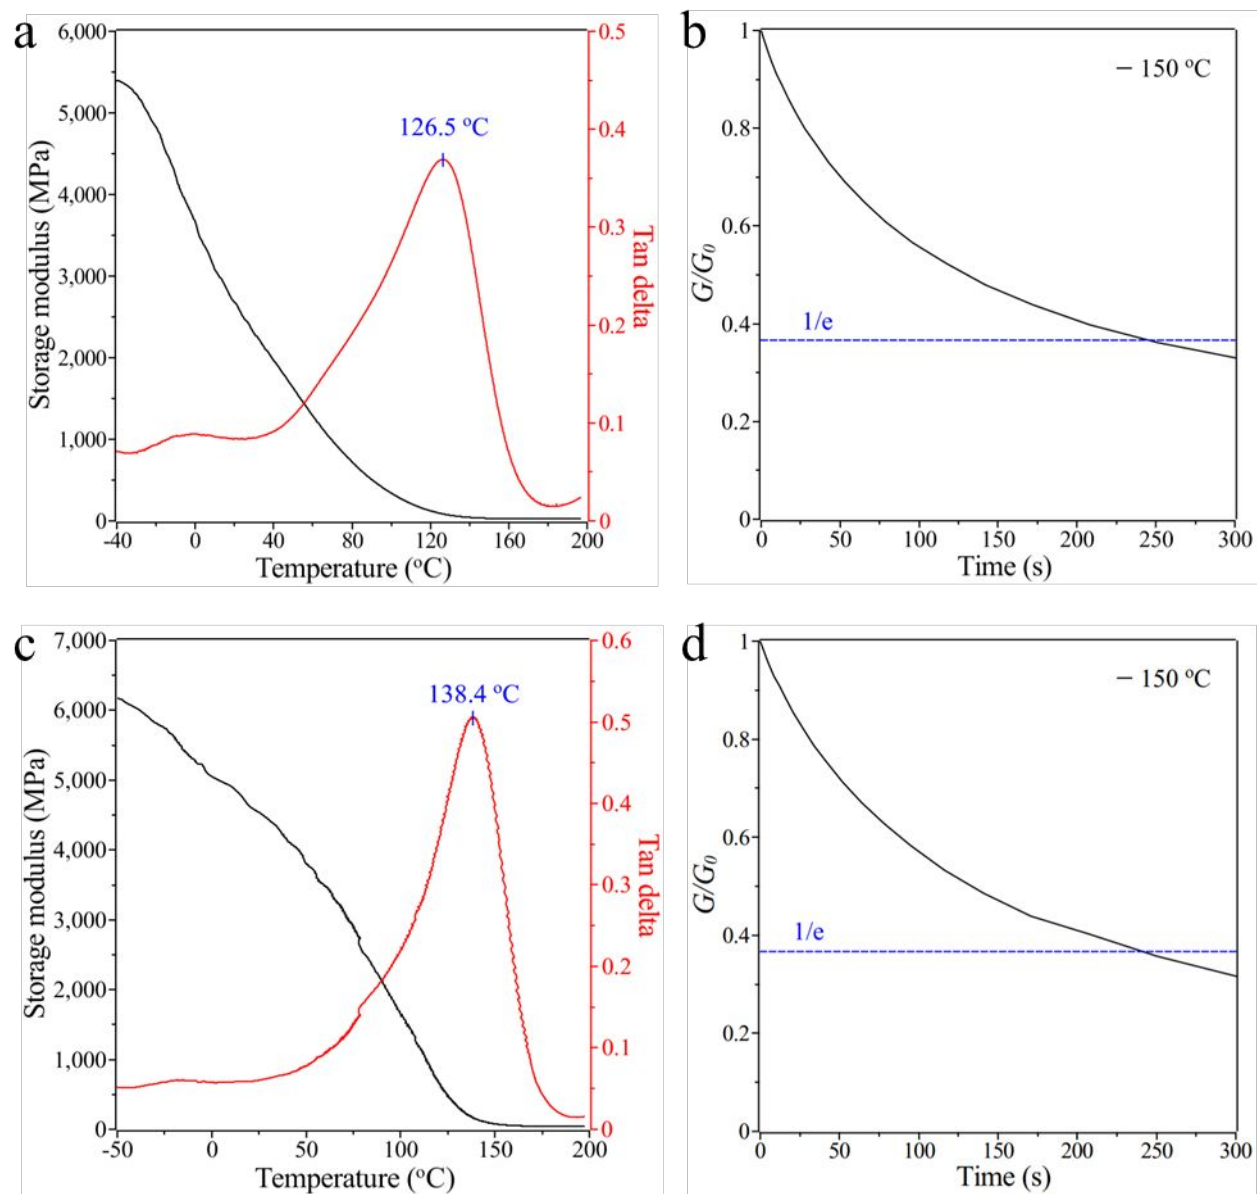

**Figure S4.** (a) Storage modulus and tan delta curves and (b) normalized stress relaxation curve of the BPA-BA sample at 150 °C. (c) Storage modulus and tan delta curves and (d) normalized stress relaxation curve of the BPA-MA sample at 150 °C.

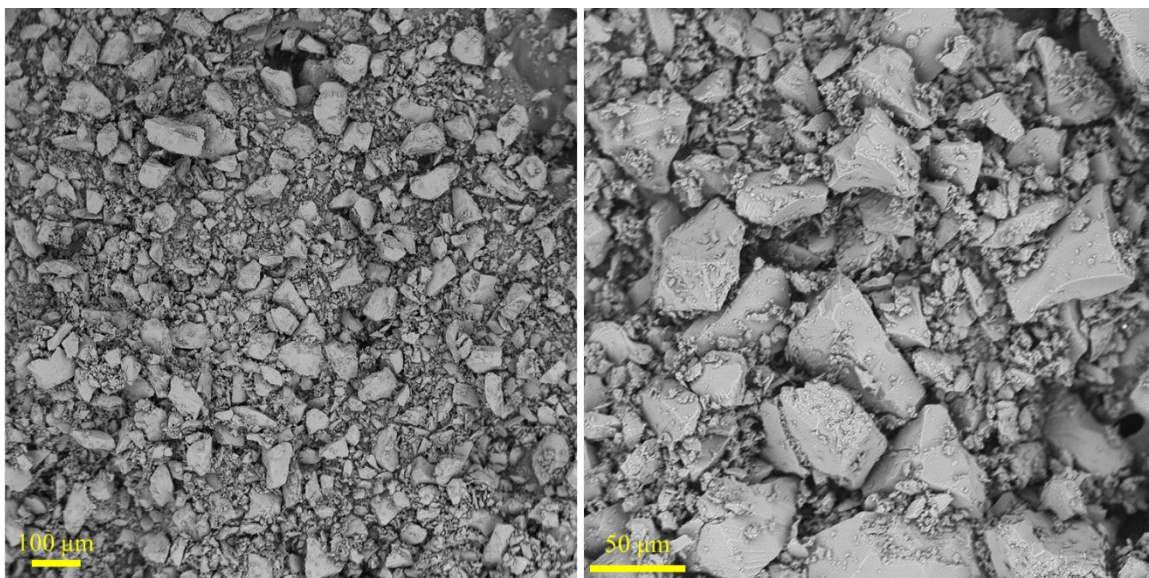

**Figure S5.** SEM images of the BPA thermoset polymer powders after milled at 400 rpm for 2 h at different magnifications.

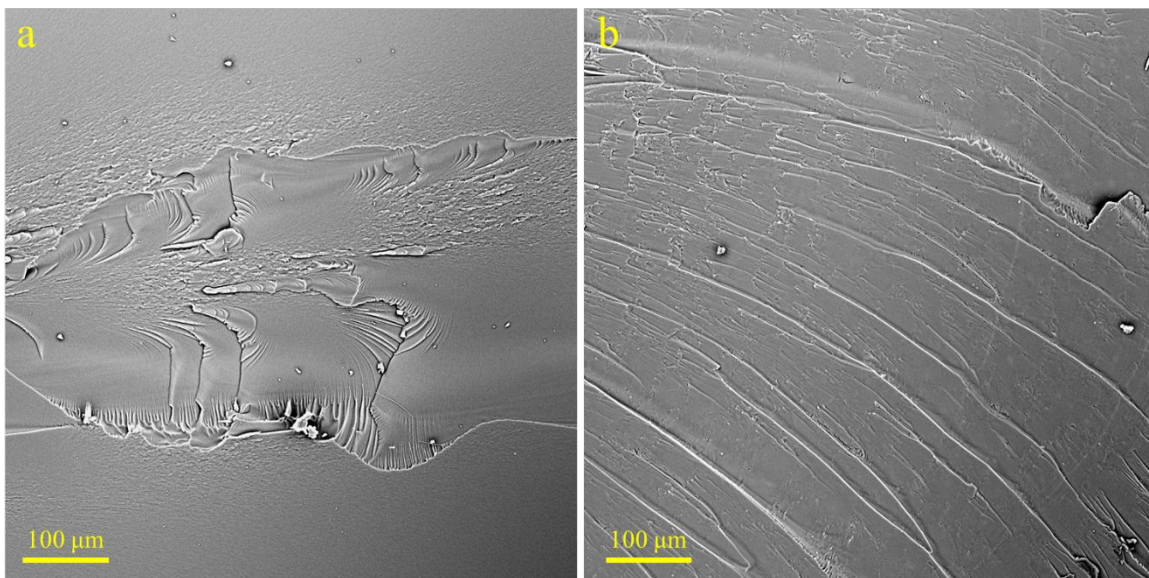

**Figure S6.** SEM images of the fracture surface of (a) the original BPA thermoset and (b) the recycled BPA sample after compression at 150 °C for 1 h.



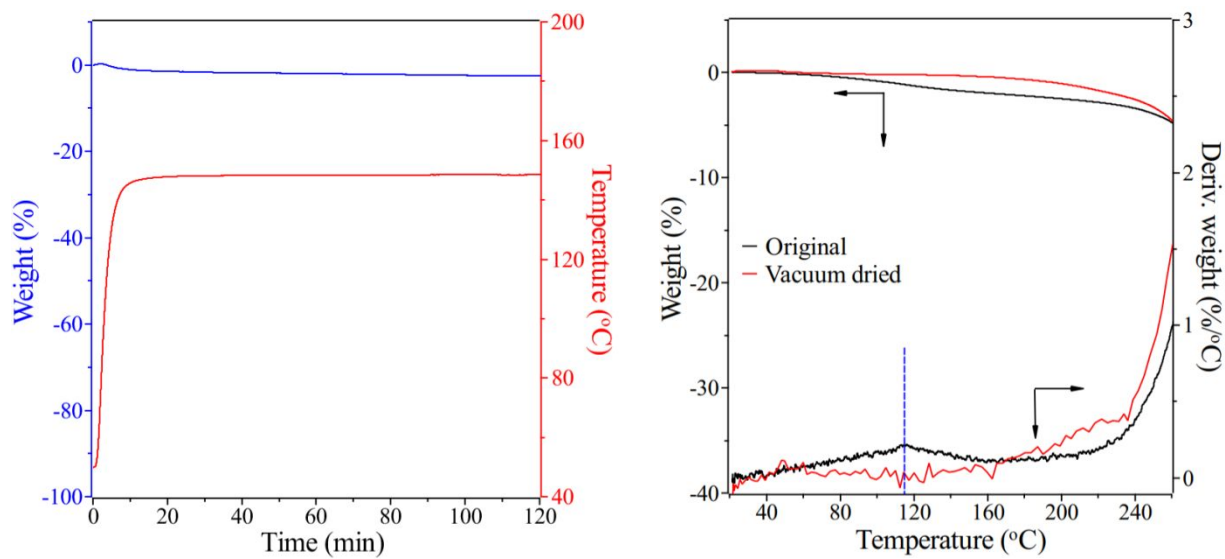

**Figure S7.** Isothermal degradation behavior of the BPA network at 148 °C for around 2 h (left). TG curves of as-prepared BPA network and the BPA network after vacuum drying.

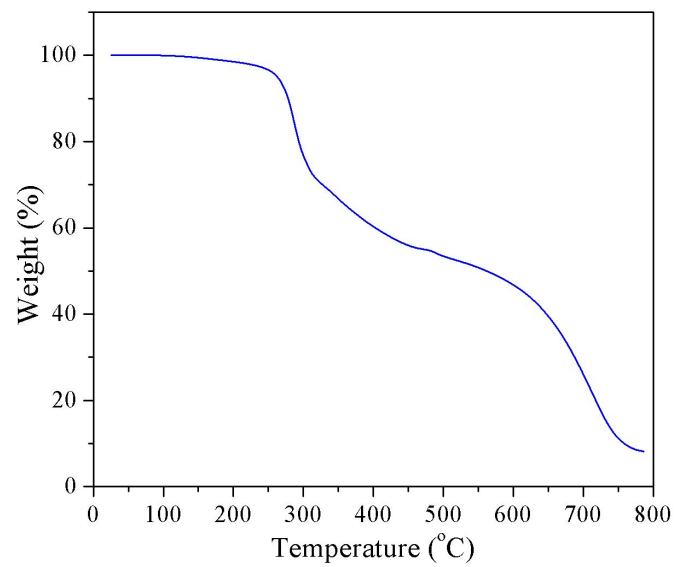

**Figure S8.** TG curve of the BPA sample under air atmosphere at a heating rate of 10 °C/min.

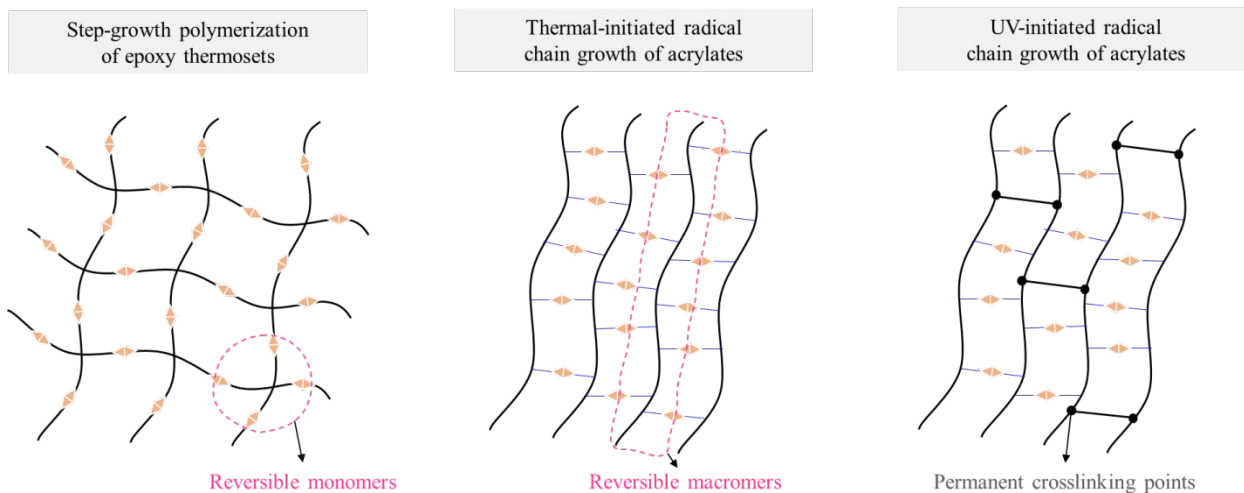

**Figure S9.** Three classic CANs resulting from step-growth polymerization of epoxy thermosets, thermal-initiated and UV-initiated radical chain growth polymerization of acrylates, respectively.

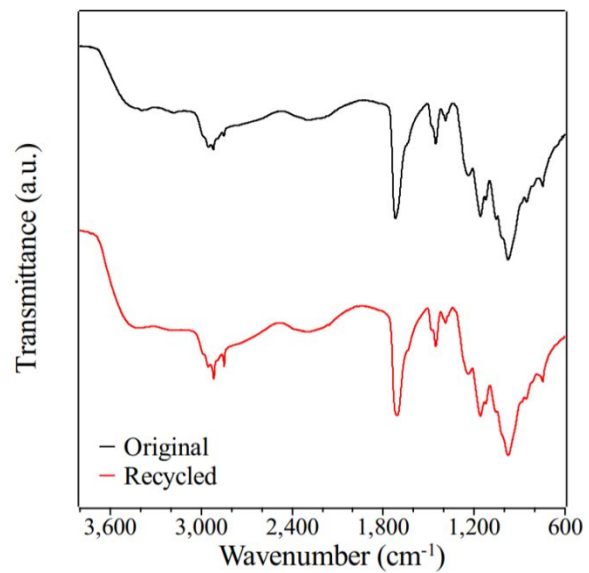

**Figure S10.** FTIR spectra of the original and the recycled BPA network samples.

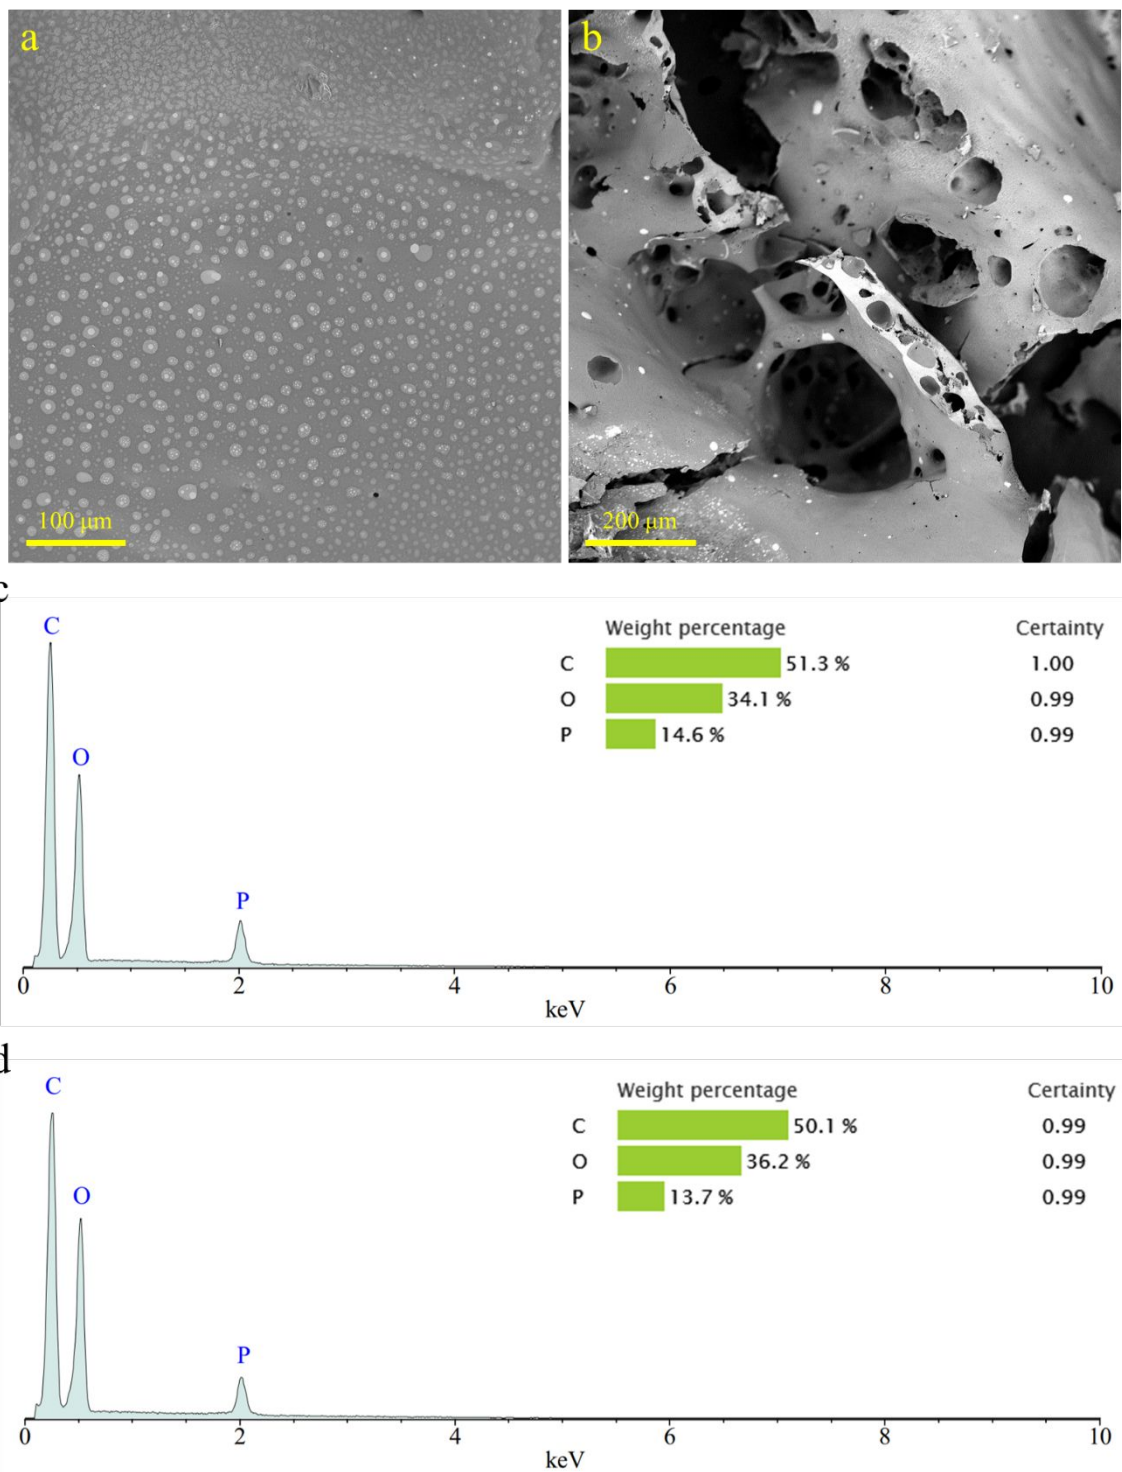

**Figure S11.** SEM images of (a) the surface structure and (b) inner structure of the BPA char residue. EDS results of (c) the surface structure and (d) inner structure of the BPA char residue.

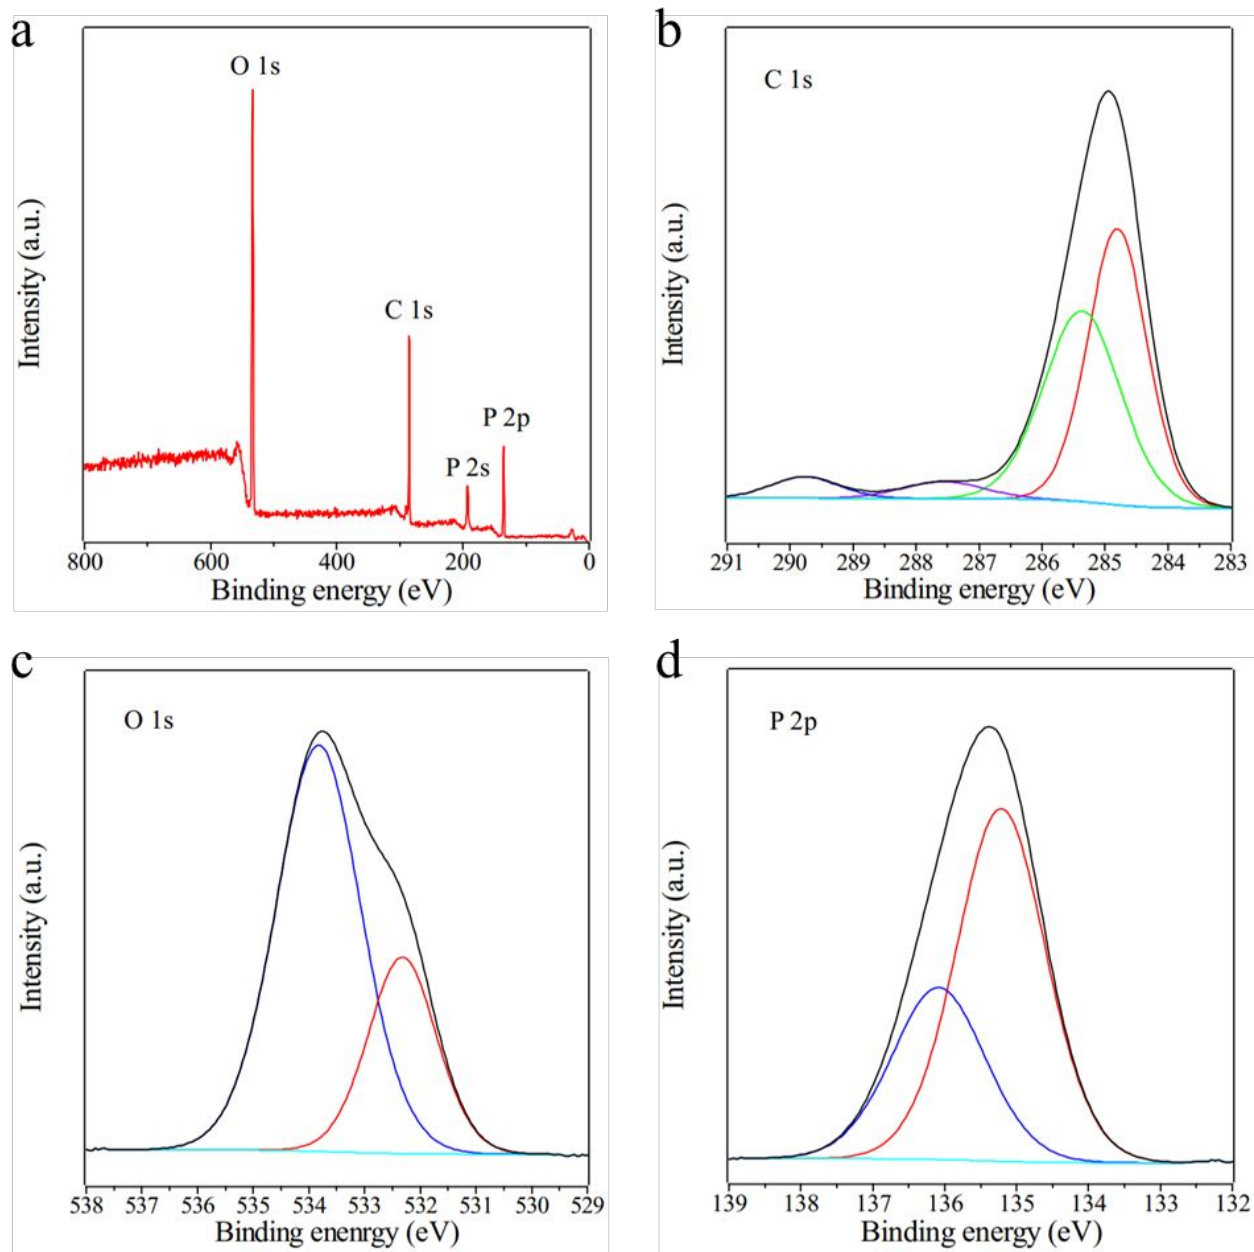

**Figure S12.** (a) XPS survey spectrum for the burned char of the BPA sample. High-resolution (b) C 1s, (c) O 1s, and (d) P 2p XPS spectra of the burned char of the BPA sample.

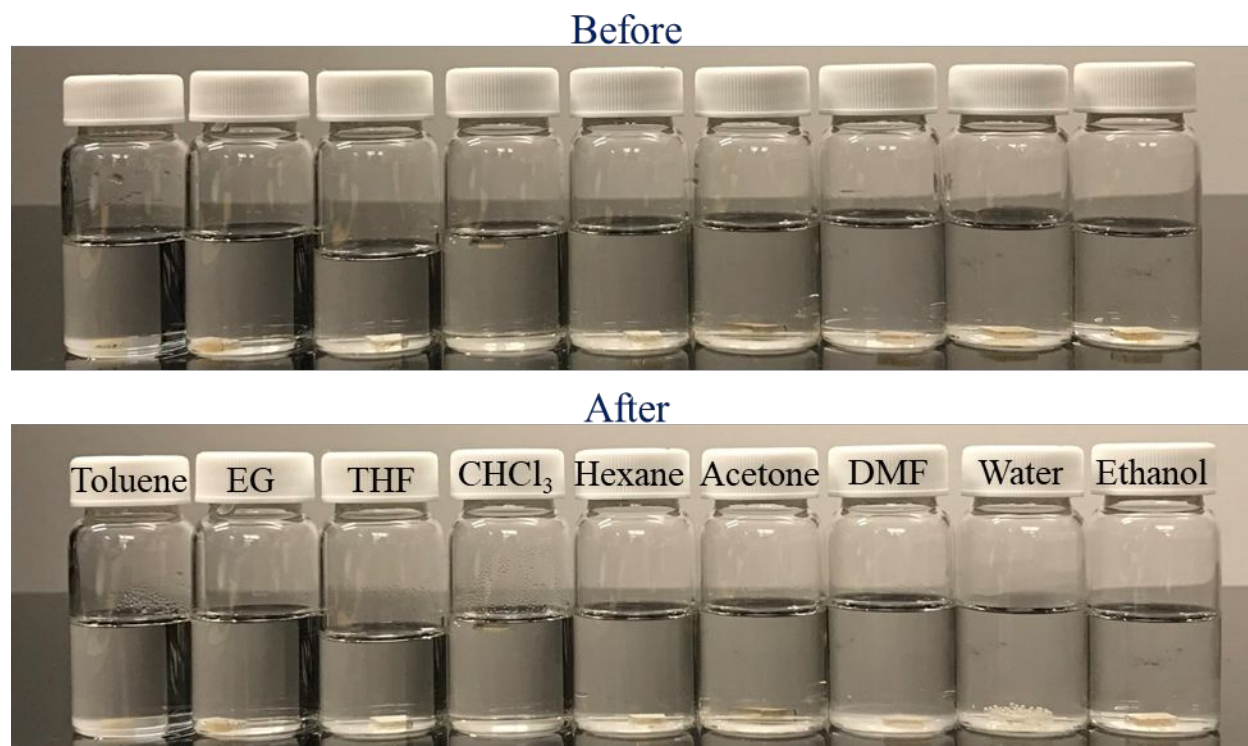

**Figure S13.** The dissolution experiments for the BPA network. It shows that the BPA samples were stable in the organic solvents, such as ethanol, acetone, chloroform, toluene and hexanes tetrahydrofuran (THF), ethylene glycol (EG) and dimethyl formamide (DMF) after 4 days immersion. After immersing in water for 4 days, some bubbles can be observed, indicating the possibility of hydrolyzation of the BPA networks.

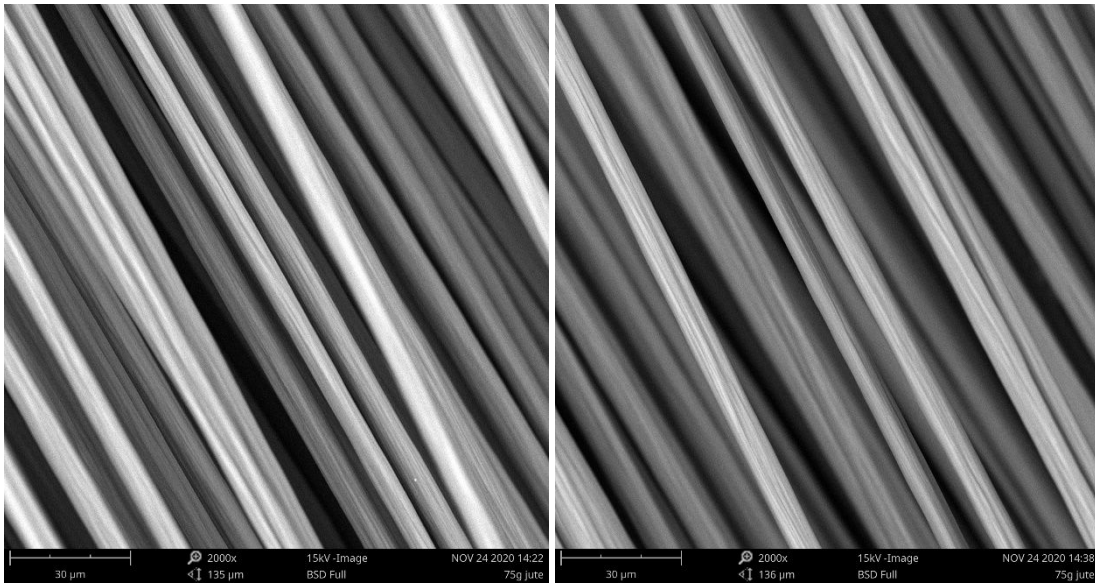

**Figure S14.** SEM images of the original (left) and recycled (right) carbon fibers.



**Table S1.** Basic properties of the BPA network.

| <b>Sample</b> | <b>T<sub>5%</sub> (°C)</b> | <b>T<sub>g</sub> (°C)</b> | <b>Glassy modulus<br/>(25 °C) (MPa)</b> | <b>Rubbery modulus<br/>(T<sub>g</sub> + 30 °C) (MPa)</b> | <b>Crosslinking<br/>density (mol/m<sup>3</sup>)</b> |
|---------------|----------------------------|---------------------------|-----------------------------------------|----------------------------------------------------------|-----------------------------------------------------|
| BPA           | 262.7                      | 152.4                     | 2920.6                                  | 75.7                                                     | 7.1 × 10 <sup>3</sup>                               |

**Table S2.** Summary of recycling properties of the BPA network under different conditions.

| <b>Sample</b> | <b>Recycling condition</b> | <b>Tensile strength (MPa)</b> | <b>Young's modulus (GPa)</b> | <b>Elongation at break (%)</b> | <b>Recycling efficiency (%)</b> |
|---------------|----------------------------|-------------------------------|------------------------------|--------------------------------|---------------------------------|
| Original      | --                         | 54.6 ± 2.0                    | 1.5 ± 0.2                    | 7.5 ± 1.9                      | --                              |
| A             | 50 °C, 5 h, 10 MPa         | 18.3 ± 4.1                    | 1.7 ± 0.2                    | 1.4 ± 0.1                      | 33.5                            |
| B             | 125 °C, 1 h, 10 MPa        | 37.4 ± 0.8                    | 1.9 ± 0.0                    | 3.1 ± 0.1                      | 68.5                            |
| C             | 150 °C, 1 h, 10 MPa        | 41.2 ± 3.3                    | 2.0 ± 0.6                    | 3.5 ± 1.6                      | 75.5                            |

**Table S3.** Comparison of recycling conditions and performances of the BPA network with those of reported dynamic networks.

| System                          | Ref.                 | T <sub>g</sub><br>(°C) | Recycling<br>temperature<br>(°C) | Δ T (°C)    | Recycling<br>time (h) | Recycling<br>pressure<br>(MPa) | σ <sub>o</sub><br>(MPa) | σ <sub>R</sub><br>(MPa) | Recycling<br>efficiency<br>(%) | Catalyst<br>-free | Flame<br>retardancy |
|---------------------------------|----------------------|------------------------|----------------------------------|-------------|-----------------------|--------------------------------|-------------------------|-------------------------|--------------------------------|-------------------|---------------------|
| UV cured<br>glassy<br>thermoset | <b>This<br/>work</b> | <b>152.4</b>           | <b>150</b>                       | <b>-2.4</b> | <b>1</b>              | <b>10</b>                      | <b>54.6</b>             | <b>41.2</b>             | <b>75.5</b>                    | <b>Yes</b>        | <b>Yes</b>          |
|                                 |                      |                        | 125                              | -27.4       | 1                     | 10                             |                         | 37.4                    | 68.5                           |                   |                     |
|                                 |                      |                        | 50                               | -102.4      | 5                     | 10                             |                         | 18.3                    | 33.5                           |                   |                     |
|                                 | <sup>3</sup>         | 62                     | 170                              | 108         | 4                     | 300                            | 38.1                    | ~31                     | ~81.4                          | Yes               | No                  |
|                                 |                      |                        | 140                              | 78          | 4                     | 300                            |                         | ~15                     | ~39.4                          |                   |                     |
|                                 |                      |                        | 80                               | 18          | 4                     | 300                            |                         | ~19                     | ~49.9                          |                   |                     |
|                                 |                      |                        | 110                              | 48          | 4                     | 300                            |                         | ~0.5                    | ~1.2                           |                   |                     |
|                                 | <sup>4</sup>         | 108.3                  | 180                              | 71.7        | 2                     | 15                             | 44                      | 33                      | 75                             | No                | No                  |
|                                 | <sup>5</sup>         | ~55                    | 220                              | 165         | 2                     | 500                            | ~15.2                   | ~13.9                   | ~91.5                          | No                | No                  |
|                                 | <sup>6</sup>         | 75                     | 150                              | 75          | 2                     | 6                              | 36.7                    | 14.6                    | 40.0                           | Yes               | No                  |
|                                 |                      |                        | 150                              | 75          | 2                     | 9                              |                         | 17.2                    | 46.9                           |                   |                     |
|                                 |                      |                        | 150                              | 75          | 2                     | 14                             |                         | 25.5                    | 69.5                           |                   |                     |
|                                 |                      |                        | 130                              | 55          | 2                     | 14                             |                         | 12.4                    | 33.8                           |                   |                     |
|                                 |                      |                        | 175                              | 100         | 2                     | 14                             |                         | 19.3                    | 52.6                           |                   |                     |
|                                 | <sup>7</sup>         | 95                     | 200                              | 105         | 2                     | 12                             | 62.0                    | 17.6                    | 28.4                           | Yes               | No                  |
| 150                             |                      |                        | 55                               | 2           | 12                    | 13.5                           |                         | 21.8                    |                                |                   |                     |
| 150                             |                      |                        | 55                               | 2           | 9                     | 12.7                           |                         | 20.5                    |                                |                   |                     |

|           |               |       |     |    |      |     |     |    |    |       |      |      |     |    |
|-----------|---------------|-------|-----|----|------|-----|-----|----|----|-------|------|------|-----|----|
|           | <sup>8</sup>  | 113   | 130 | 80 | 17   | -33 | 1   | 24 | 10 | 44.8  | 44.9 | 100  | Yes | No |
|           | <sup>9</sup>  | 131.1 | 180 |    | 48.9 |     | 2   |    | 15 | 117.7 | 96.0 | 81.6 | Yes | No |
| UV cured  | <sup>10</sup> | -116  | 100 |    | 216  |     | 12  |    | 22 | 0.23  | 0.21 | 91.3 | Yes | No |
| elastomer | <sup>11</sup> | --    | 130 |    | --   |     | 0.5 |    | -- | 1.3   | 1.1  | 84.6 | Yes | No |

$\Delta T$  is the difference between recycling temperature and glass transition temperature;

$\sigma_0$  is the tensile strength of original sample, and  $\sigma_R$  is the tensile strength of recycled sample;

**Table S4.** The atomic percentage of each elements in original and burned BPA samples tested by XPS.

| <b>Sample</b> | <b>P 2p</b> | <b>C 1s</b> | <b>O 1s</b> |
|---------------|-------------|-------------|-------------|
| Original      | 2.54 at %   | 66.98 at %  | 30.47 at %  |
| Burned char   | 17.80 at %  | 40.82 at %  | 41.39 at %  |

**Table S5.** Weight change of the BPA samples before and after organic solvents immersion for 4 days at ambient temperature.

| <b>Solvents</b>   | <b>Before</b> | <b>After</b> |
|-------------------|---------------|--------------|
| Toluene           | 100 %         | 100.55 %     |
| EG                | 100 %         | 100.19 %     |
| THF               | 100 %         | 100.92 %     |
| CHCl <sub>3</sub> | 100 %         | 100.42 %     |
| Hexane            | 100 %         | 100.59 %     |
| Acetone           | 100 %         | 100.23 %     |
| DMF               | 100 %         | 100.62 %     |
| Ethanol           | 100 %         | 101.02 %     |

**Table S6.** Summary of tensile properties of the original BPA composite and regenerated BPA composite.

| <b>Sample</b> | <b>Tensile strength (MPa)</b> | <b>Elongation at break (%)</b> |
|---------------|-------------------------------|--------------------------------|
| Original      | $370.6 \pm 7.9$               | $4.1 \pm 0.2$                  |
| Regenerated   | $328.9 \pm 5.2$               | $3.6 \pm 0.3$                  |

## References

- (1) Nishimura, Y.; Chung, J.; Muradyan, H.; Guan, Z. B. Silyl Ether as a Robust and Thermally Stable Dynamic Covalent Motif for Malleable Polymer Design. *J. Am. Chem. Soc.* **2017**, *139* (42), 14881-14884.
- (2) He, C. F.; Shi, S. W.; Wang, D.; Helms, B. A.; Russell, T. P. Poly(oxime-ester) Vitrimers with Catalyst-Free Bond Exchange. *J. Am. Chem. Soc.* **2019**, *141* (35), 13753-13757.
- (3) Li, C.; Liu, J. W.; Chen, Y. Z.; Li, T.; Cai, X. X.; Sung, J. G.; Sun, X. Z. S. Hybrid Network via Instantaneous Photoradiation: High Efficient Design of 100% Bio-Based Thermosets with Remoldable and Recyclable Capabilities after UV Curing. *Chem. Eng. J.* **2018**, *336*, 54-63.
- (4) Wang, S. P.; Wu, Y. G.; Dai, J. Y.; Teng, N.; Peng, Y. Y.; Cao, L. J.; Liu, X. Q. Making Organic Coatings Greener: Renewable Resource, Solvent-Free Synthesis, UV Curing and Repairability. *Eur. Polym. J.* **2020**, *123*, article no. 109439.
- (5) Zhang, B.; Kowsari, K.; Serjouei, A.; Dunn, M. L.; Ge, Q. Reprocessable Thermosets for Sustainable Three-Dimensional Printing. *Nat. Commun.* **2018**, *9*, article no. 1831.
- (6) Li, A.; Fan, J. Z.; Li, G. Q. Recyclable Thermoset Shape Memory Polymers with High Stress and Energy Output via Facile UV-Curing. *J. Mater. Chem. A* **2018**, *6* (24), 11479-11487.
- (7) Li, A.; Challapalli, A.; Li, G. Q. 4D Printing of Recyclable Lightweight Architectures Using High Recovery Stress Shape Memory Polymer. *Sci. Rep.* **2019**, *9*, article no. 7621.
- (8) Li, X. P.; Yu, R.; He, Y. Y.; Zhang, Y.; Yang, X.; Zhao, X. J.; Huang, W. Four-Dimensional Printing of Shape Memory Polyurethanes with High Strength and Recyclability Based on Diels-Alder Chemistry. *Polymer* **2020**, *200*, article no. 122532.
- (9) Wang, S. P.; Teng, N.; Dai, J. Y.; Liu, J. K.; Cao, L. J.; Zhao, W. W.; Liu, X. Q. Taking Advantages of Intramolecular Hydrogen Bonding to Prepare Mechanically Robust and Catalyst-Free Vitriimer. *Polymer* **2020**, *210*, article no. 123004.



(10) Liu, Z.; Hong, P.; Huang, Z. Y.; Zhang, T.; Xu, R. J.; Chen, L. J.; Xiang, H. P.; Liu, X. X. Self-Healing, Reprocessing and 3D Printing of Transparent and Hydrolysis-Resistant Silicone Elastomers. *Chem. Eng. J.* **2020**, *387*, article no. 124412.

(11) Aizpurua, J.; Martin, L.; Fernandez, M.; Gonzalez, A.; Irusta, L. Recyclable, Remendable and Healing Polyurethane/Acrylic Coatings from UV Curable Waterborne Dispersions Containing Diels-Alder Moieties. *Prog. Org. Coat.* **2020**, *139*, article no. 105460.
